# Supplementary material for: Resistance to the nucleotide analogue cidofovir in HPV(+) cells: a multifactorial process involving UMP/CMP kinase 1
Source: PubMed Central journal article supplement (PMC4891127; doi:10.18632/oncotarget.7006), 2016-01-25
Supplement: oncotarget-07-10386-s001.pdf [file oncotarget-07-10386-s001.pdf]

## Resistance to the nucleotide analogue cidofovir in HPV(+) cells: a multifactorial process involving UMP/CMP kinase 1

### Supplementary Materials

**Supplementary Table S1: Chemical compounds tested in this study (the structure of these drugs is in depicted Figure S9)**

| Group                  | Designation(s) of compound          | Description                                                                                                                                                  |
|------------------------|-------------------------------------|--------------------------------------------------------------------------------------------------------------------------------------------------------------|
| First class ANP        | HPMPC, cidofovir, CDV, Vistide® (1) | (S)-1-[3-hydroxy-2-(phosphonomethoxy)propyl]cytosine                                                                                                         |
|                        | cHPMPC, cyclic cidofovir, cCDV (2)  | Cyclic (S)-HPMPC                                                                                                                                             |
|                        | HPMPA (3)                           | (S)-9-[3-hydroxy-2-(phosphonomethoxy)propyl]adenine                                                                                                          |
|                        | cHPMPA (4)                          | Cyclic (S)-HPMPA                                                                                                                                             |
|                        | 3-deaza-HPMPA (5)                   | (S)-9-[3-hydroxy-2-(phosphonomethoxy)propyl]-3-deazaadenine                                                                                                  |
|                        | HPMPDAP (6)                         | (S)-9-[3-hydroxy-2-(phosphonomethoxy)propyl]-2,6-diaminopurine                                                                                               |
|                        | PMEA, adefovir, Hepsera® (7)        | 9-[2-(phosphonomethoxy)ethyl]adenine                                                                                                                         |
|                        | PMEDAP (8)                          | 9-[2-(phosphonomethoxy)ethyl]-2,6-diaminopurine                                                                                                              |
|                        | PMEG (9)                            | 9-[2-(phosphonomethoxy)ethyl]guanine                                                                                                                         |
|                        | cPr-PMEDAP (10)                     | 9-[2-(phosphonomethoxy)ethyl]-N <sup>6</sup> -cyclopropyl-2,6-diaminopurine                                                                                  |
| Second class ANP       | HPMPO-DAPY (11)                     | (R)-{2,4-diamino-3-hydroxy-6-[2-(phosphonomethoxy)propyl]} pyrimidine                                                                                        |
|                        | PMEO-DAPY (12)                      | 2,4-diamino-6-[2-(phosphonomethoxy)ethoxy]pyrimidine                                                                                                         |
| Third class ANP        | HPMP-5-azaC (13)                    | (S)-1-[3-hydroxy-2-(phosphonomethoxy)propyl]-5-azacytosine                                                                                                   |
|                        | cHPMP-5-azaC (14)                   | Cyclic HPMP-5-azaC                                                                                                                                           |
| Microtubule inhibitors | Vincristine (a)                     | 22-oxovincalcoloblastine                                                                                                                                     |
|                        | Docetaxel, taxotere (b)             | 1,7β,10β-trihydroxy-9-oxo-5β,20-epoxytax-11-ene-2α,4,13α-triyl 4-acetate 2-benzoate 13-[(2R,3S)-3-[(tert-butoxycarbonyl)amino]-2-hydroxy-3-phenylpropanoate] |
| Anti-metabolites       | Methotrexate (c)                    | (2S)-2-[(4-[(2,4-diaminopteridin-6-yl)methyl](methyl)amino)benzoyl]amino]pentanedioic acid                                                                   |
|                        | Fludarabine (d)                     | [(2R,3R,4S,5R)-5-(6-amino-2-fluoro-purin-9-yl)-3,4-dihydroxy-oxolan-2-yl]methoxyphosphonic acid                                                              |
|                        | 5-Fluorouracil, 5-FU (e)            | 5-fluoro-1H,3H-pyrimidine-2,4-dione                                                                                                                          |
|                        | Cytarabine, araC (f)                | 4-amino-1-[(2R,3S,4R,5R)-3,4-dihydroxy-5-(hydroxymethyl)oxolan-2-yl]pyrimidin-2-one                                                                          |
|                        | Gemcitabine (g)                     | 4-amino-1-(2-deoxy-2,2-difluoro-β-D-erythro-pentofuranosyl)pyrimidin-2(1H)-on                                                                                |
|                        | Hydroxyurea (h)                     | Hydroxyurea                                                                                                                                                  |

|                                        |                                  |                                                                                                                                                                                                                                                                                                                                                                                                                                                                                                                                        |
|----------------------------------------|----------------------------------|----------------------------------------------------------------------------------------------------------------------------------------------------------------------------------------------------------------------------------------------------------------------------------------------------------------------------------------------------------------------------------------------------------------------------------------------------------------------------------------------------------------------------------------|
| <b>Topoisomerase inhibitors</b>        | Camptothecin ( <b>i</b> )        | (S)-4-ethyl-4-hydroxy-1H-pyrano[3',4':6,7]indolizino[1,2-b]quinoline-3,14-(4H,12H)-dione                                                                                                                                                                                                                                                                                                                                                                                                                                               |
|                                        | SN-38 ( <b>j</b> )               | 7-Ethyl-10-hydroxy-camptothecin                                                                                                                                                                                                                                                                                                                                                                                                                                                                                                        |
|                                        | Topotecan ( <b>k</b> )           | (S)-10-[(dimethylamino)methyl]-4-ethyl-4,9-dihydroxy-1H-pyrano [3',4':6,7] indolizino [1, 2-b]quinoline-3,14(4H,12H)-dione monohydrochloride                                                                                                                                                                                                                                                                                                                                                                                           |
|                                        | Etoposide ( <b>l</b> )           | 4'-Demethyl-epipodophyllotoxin 9-[4,6-O-(R)-ethylidene-beta-D-glucopyranoside], 4' -(dihydrogen phosphate)                                                                                                                                                                                                                                                                                                                                                                                                                             |
| <b>DNA damage inducers</b>             | Daunorubicin ( <b>m</b> )        | (8S,10S)-8-acetyl-10-[(2S,4S,5S,6S)-4-amino-5-hydroxy-6-methyl-oxan-2-yl]oxy-6,8,11-trihydroxy-1-methoxy-9,10-dihydro-7H-tetracene-5,12-dione                                                                                                                                                                                                                                                                                                                                                                                          |
|                                        | Cis-platin ( <b>n</b> )          | (SP-4-2)-diamminedichloroplatinum(II)                                                                                                                                                                                                                                                                                                                                                                                                                                                                                                  |
|                                        | Bleomycin ( <b>o</b> )           | (3-{{(2'-{{(5S,8S,9S,10R,13S)-15-{{6-amino-2- [[(1S)-3-amino-1-{{(2S)-2,3-diamino-3-oxopropyl]amino}-3-oxopropyl]-5-methylpyrimidin-4-yl}}-13-[[{(2R,3S,4S,5S,6S)-3-{{(2R,3S,4S,5R,6R)-4-(carbamoyloxy)-3,5-dihydroxy-6-(hydroxymethyl)tetrahydro-2H-pyran-2-yl]oxy}} -4,5-dihydroxy-6-(hydroxymethyl)tetrahydro-2H-pyran-2-yl]oxy}} (1H-imidazol-5-yl)methyl]-9-hydroxy-5-[(1R)-1-hydroxyethyl]-8,10-dimethyl-4,7,12,15-tetraoxo-3,6,11,14-tetraazapentadec-1-yl}}-2,4'-bi-1,3-thiazol-4-yl)carbonyl]amino}propyl)(dimethyl)sulfonium |
| <b>EGFR inhibitors</b>                 | Canertinib, CI-1033 ( <b>p</b> ) | N-{4-[(3-Chloro-4-fluorophenyl)amino]-7-[3-(morpholin-4-yl)propoxy]quinazolin-6-yl}prop-2-enamide                                                                                                                                                                                                                                                                                                                                                                                                                                      |
| <b>P-glycoprotein inhibitors</b>       | Zosuquidar ( <b>A</b> )          | (2R)-1-{4-[(1aR,10bS)-1,1-difluoro-1,1a,6,10b-tetrahydrodibenzo[a,e]cyclopropa[c][7]annulen-6-yl]-3-(quinolin-5-yloxy)propan-2-ol                                                                                                                                                                                                                                                                                                                                                                                                      |
|                                        | Tariquidar ( <b>B</b> )          | N-[2-[[4-[2-(6,7-Dimethoxy-3,4-dihydro-1H-isoquinolin-2-yl)ethyl]phenyl]carbonyl]-4,5-dimethoxyphenyl]quinoline-3-carboxamide                                                                                                                                                                                                                                                                                                                                                                                                          |
| <b>MRP inhibitors</b>                  | Reversan ( <b>C</b> )            | N-[3-(4-Morpholinyl)propyl]-5,7-diphenyl-pyrazolo[1,5-a]pyrimidine-3-carboxamide                                                                                                                                                                                                                                                                                                                                                                                                                                                       |
|                                        | MK-571 ( <b>D</b> )              | 5-(3-(2-(7-Chloroquinolin-2-yl)ethenyl)phenyl)-8-dimethylcarbonyl-4,6-dithiaoctanoic acid                                                                                                                                                                                                                                                                                                                                                                                                                                              |
| <b>COX-1 &amp; -2 inhibitor</b>        | Indomethacin ( <b>E</b> )        | 2-{1-[(4-Chlorophenyl)carbonyl]-5-methoxy-2-methyl-1 <i>H</i> -indol-3-yl}acetic acid                                                                                                                                                                                                                                                                                                                                                                                                                                                  |
| <b>Ca<sup>2+</sup> channel blocker</b> | Verapamil ( <b>F</b> )           | (RS)-2-(3,4-dimethoxyphenyl)-5-{{2-(3,4-dimethoxyphenyl)ethyl}-(methyl)amino}-2-prop-2-ylpentanenitrile                                                                                                                                                                                                                                                                                                                                                                                                                                |

**Supplementary Table S2: (A) Oligonucleotides used for the sequencing of the UMP/CMPK1, UMP/CMPK2, HPV16 E6 and E7, HPV18 E6 and E7 genes**

| Targeted gene      | Oligonucleotides name | Sequence (5'-to-3')       |                        |
|--------------------|-----------------------|---------------------------|------------------------|
| <b>UMP/CMPK1</b>   | CMPK1_F29             | TCCACGTCTGGGCCTTAGCTT     |                        |
|                    | CMPK1_F310            | TTAAAGAGGGAAATGGATCAGACAA |                        |
|                    | CMPK1_R431            | GCCTTCCCATCCATGGTCTTG     |                        |
|                    | CMPK1_R681            | TTCCTTGTCAAAAATCTGCACAAC  |                        |
| <b>UMP/CMPK2</b>   | CMPK2_97F             | TTCGTCTGGAGCTTCCCGA       |                        |
|                    | CMPK2_116F*           | ACTGCACCCTGGCTCACTT       |                        |
|                    | CMPK2_335F            | TGCTCAGGCTGCTCTGCTACT     |                        |
|                    | CMPK2_336F*           | GCTCAGGCTGCTCTGCTACT      |                        |
|                    | CMPK2_607F            | GTGGTCCAGACTTGCCCAGTT     |                        |
|                    | CMPK2_752F*           | AGTTCAGGTTGTTGCCATC       |                        |
|                    | CMPK2_986F            | TAGACAGTACTGGCACAGCACG    |                        |
|                    | CMPK2_432R            | TTGCCGGGTGTCAGGGTCAT      |                        |
|                    | CMPK2_699R*           | GGCTTCAGGAATAAAGGAGGT     |                        |
|                    | CMPK2_822R            | ATCTGCCACTGACTGGGTCACC    |                        |
|                    | CMPK2_844R*           | ATGCAAGAGGGTGGTGACTT      |                        |
|                    | CMPK2_1156R           | GCCTCTGCAACCTCTCCTCA      |                        |
|                    | CMPK2_1306R           | GCAGGACCTTTTCTCTGGAGG     |                        |
|                    | CMPK2_1382R*          | CGTCTGCAGGACCTTTTCTC      |                        |
|                    | <b>HPV16 E6-E7</b>    | HPV16_F1                  | TGGGTTACACATTACAAGC    |
|                    |                       | HPV16_F2                  | GAGCGACCCAGAAAGTTACCAC |
| HPV16_F3           |                       | GAACAGCAATACAACAAACCGT    |                        |
| HPV16_F4           |                       | CAGAGGAGGAGGATGAAATAG     |                        |
| HPV16_R1           |                       | AAATCCCGAAAAGCAAAGTC      |                        |
| HPV16_R2           |                       | TTGTCCAGATGTCTTTGCTT      |                        |
| HPV16_R3           |                       | CACAACCGAAGCGTAGAGTC      |                        |
| HPV16_R4           |                       | CCACTACAGCCTCTACATAA      |                        |
| <b>HPV18 E6-E7</b> |                       | HPV18_F1                  | GTAACCGAAAACGGTCGGGA   |
|                    | HPV18_F2              | TAATAAGGTGCCTGCGGTGC      |                        |
|                    | HPV18_R1              | TTGGAGTCGTTCTGTCGTG       |                        |
|                    | HPV18_R2              | GTTGCTTACTGCTGGGATGC      |                        |

(\*) Alternative primers used for the sequencing of CMPK2 gene from parental and CDV-resistant HeLa and HaCaT cells.

**Supplementary Table S2: (B) Oligonucleotides used for the site-directed mutagenesis on UMP/CMPK1 gene**

| Oligonucleotides name        | Sequence (5'-to-3')                 |
|------------------------------|-------------------------------------|
| UMP/CMPK1_P64T_Fwd           | GAAGGAAAGATTGTAACAGTTGAGATAACCATCAG |
| UMP/CMPK1_P64T_Fwd_DoubleMut | GGAAAGATTGTAACAGTTGAGATAACC         |
| UMP/CMPK1_R134M_Fwd          | CGATGTCTTGAGATGGGAAAGAGTAGTGG       |

An alternative primer of UMP/CMPK\_P64T has been used for the generation of the double mutant P64T + R134M. The bases in bold and underlined are indicating the mutated position.

A

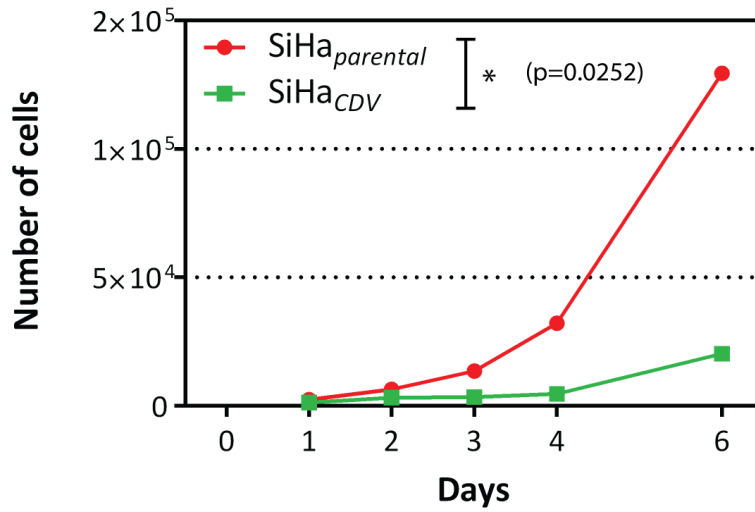

$$DT_{parental} = (22.15 \pm 0.24)h$$

$$DT_{CDV} = (36.15 \pm 2.25)h$$

B

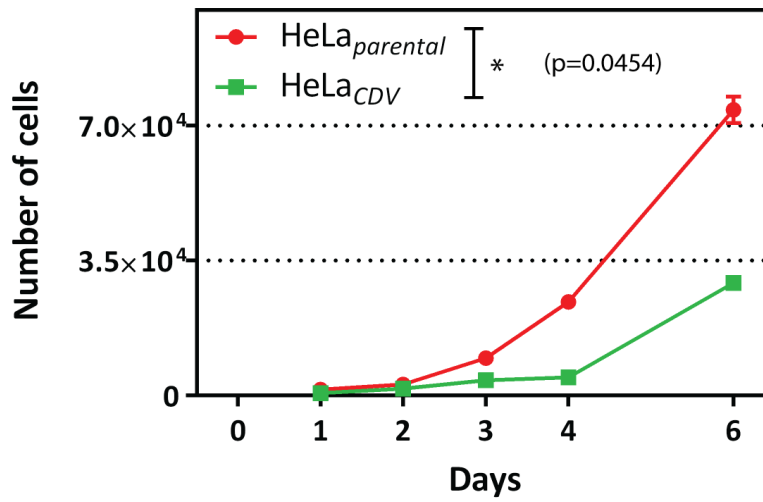

$$DT_{parental} = (20.50 \pm 0.50)h$$

$$DT_{CDV} = (23.55 \pm 0.45)h$$

C

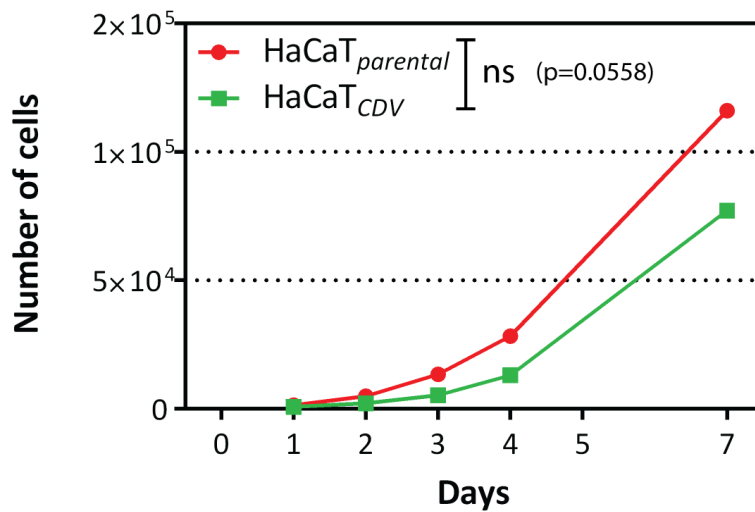

$$DT_{parental} = (26.35 \pm 0.75)h$$

$$DT_{CDV} = (23.20 \pm 0.23)h$$

**Supplementary Figure S1: Growth rate of CDV-resistant SiHa, HeLa and HaCaT cells compared to parental cells.**  
Doubling time (DT) was calculated as described in the Materials and Methods section.

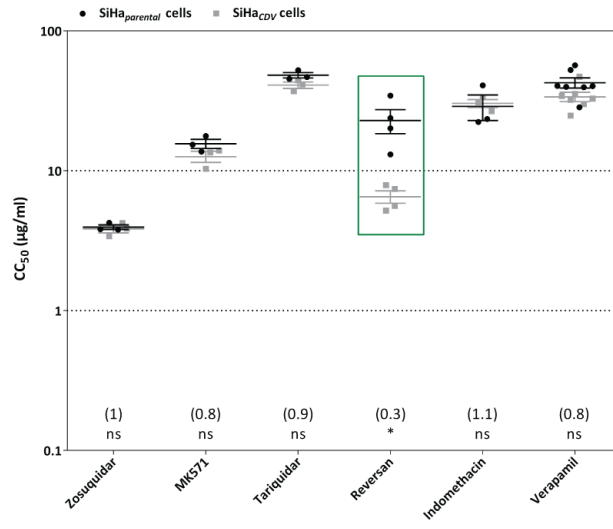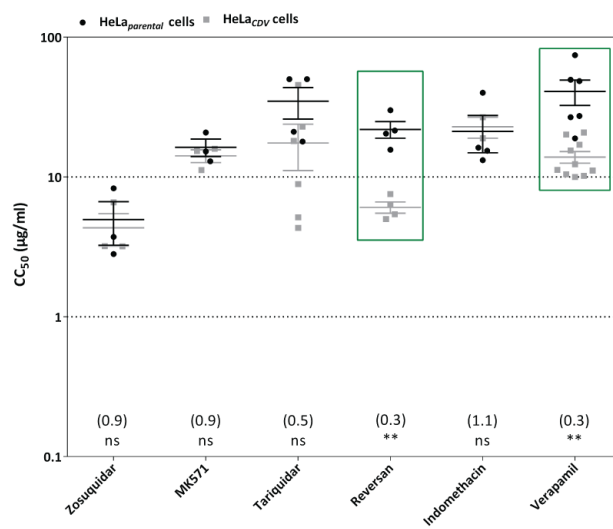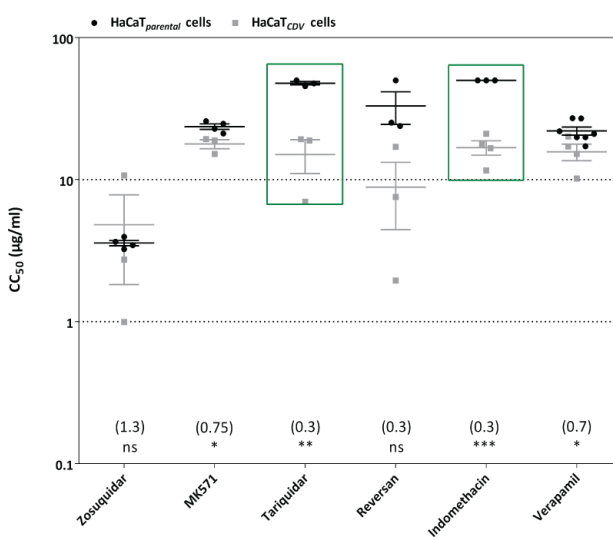

Supplementary Figure S2: antiproliferative activity of several MDR inhibitor on SiHa<sub>parental</sub>, SiHa<sub>CDV</sub>, HeLa<sub>parental</sub>, HeLa<sub>CDV</sub>, HaCaT<sub>parental</sub> and HaCaT<sub>CDV</sub>.

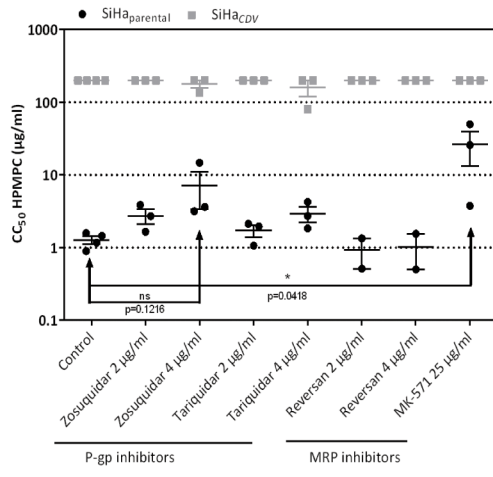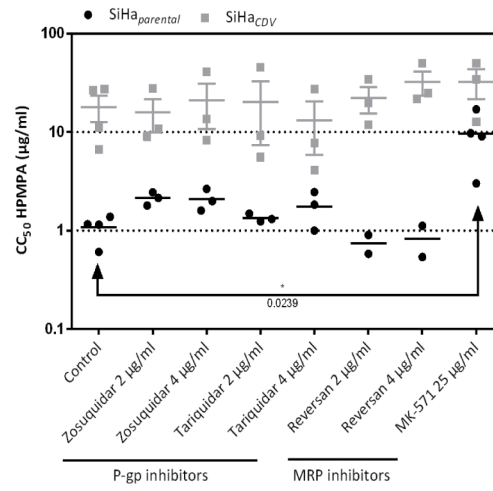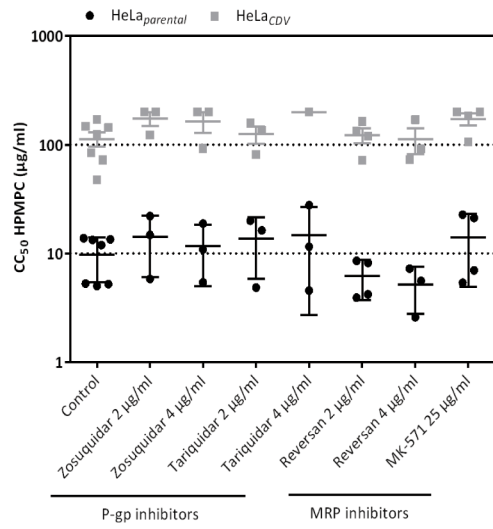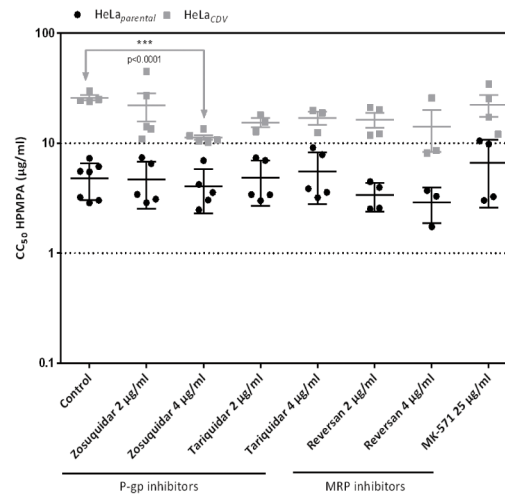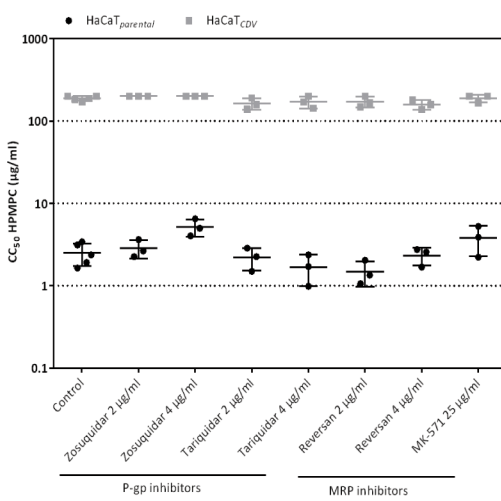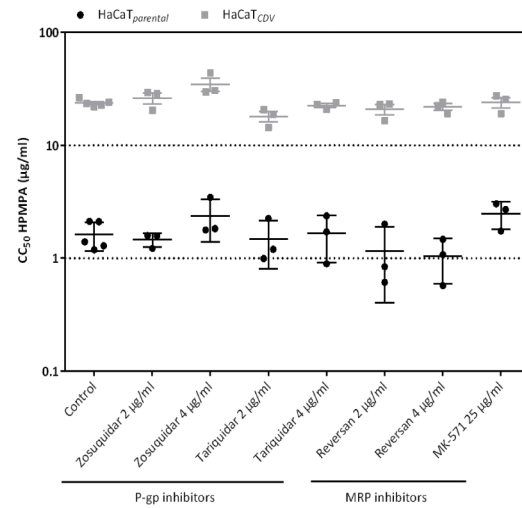

**Supplementary Figure S3: antiproliferative activity of CDV and HPMPA on SiHa<sub>parental</sub>, SiHa<sub>CDV</sub>, HeLa<sub>parental</sub>, HeLa<sub>CDV</sub>, HaCaT<sub>parental</sub> and HaCaT<sub>CDV</sub> in the presence of several MDR Inhibitors.**

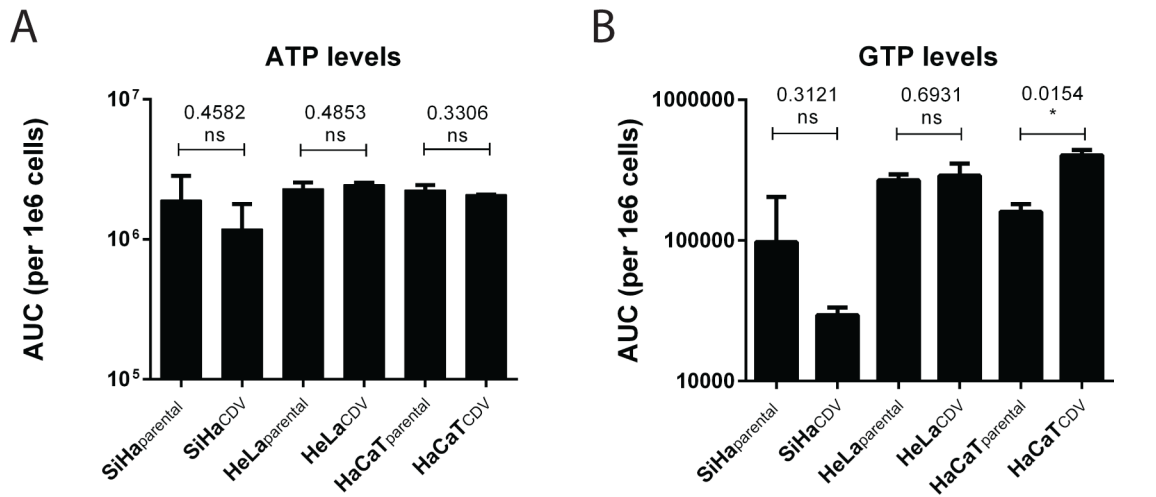

**Supplementary Figure S4: ATP and GTP levels measured by means of HPLC in parental and CDV<sup>R</sup> tumor cell lines. Statistical significance was assessed using an unpaired *t*-test.**

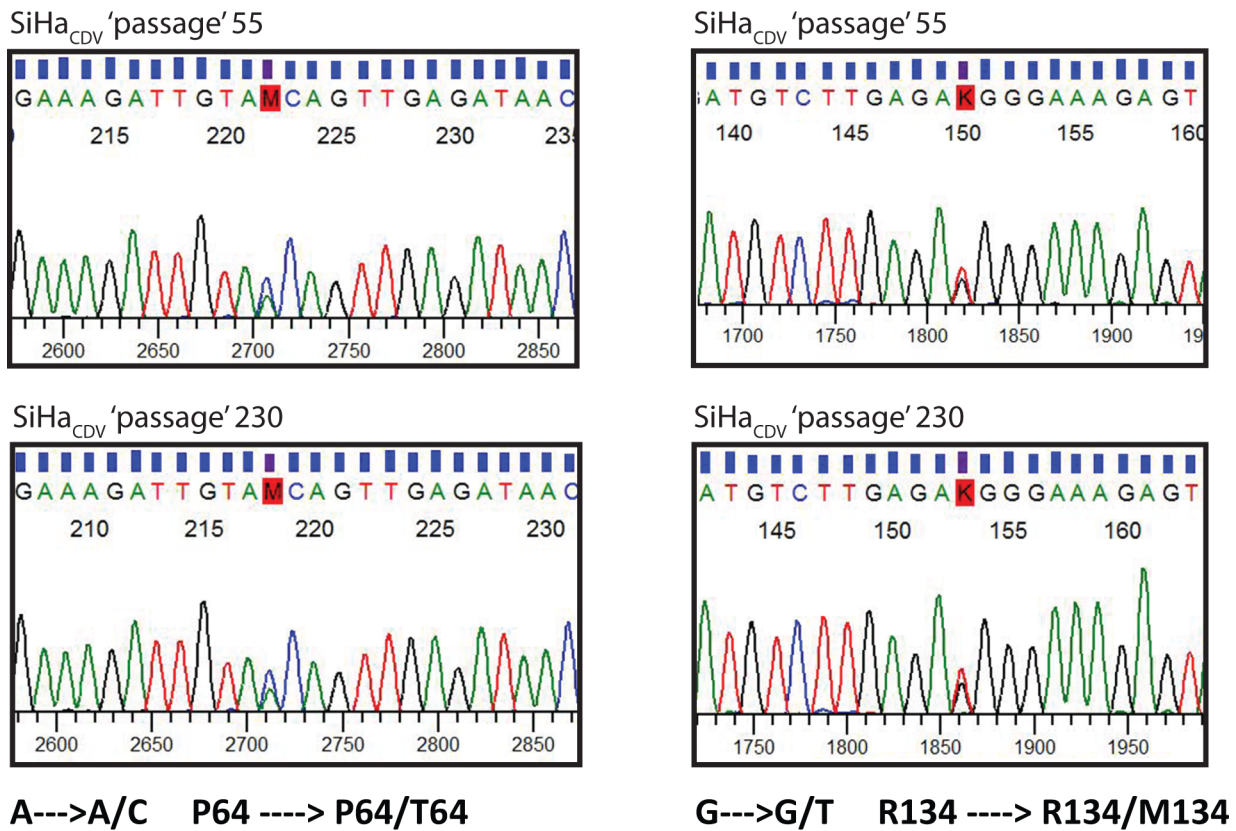

**Supplementary Figure S5: electropherograms showing the identified mutations in *CMPK1* gene of SiHa<sub>CDV</sub> at passage #55 and #230.**

A

|     |           |                                                                        |                    |     |
|-----|-----------|------------------------------------------------------------------------|--------------------|-----|
|     |           | P-loop                                                                 | NMP binding domain |     |
| WT  | UMP/CMPK1 | MKPLVVFVI <b>GGPGAGKGT</b> DCARIVEKYGYTHLSAGELLRDERKNPDSQYGELIEKYIKEGK |                    | 61  |
| Mut | UMP/CMPK1 | MKPLVVFVI <b>GGPGAGKGT</b> DCARIVEKYGYTHLSAGELLRDERKNPDSQYGELIEKYIKEGK |                    | 61  |
|     |           | 64                                                                     |                    |     |
| WT  | UMP/CMPK1 | <b>IVP</b> VEITISLLKREMDCTMAANAQKNKFLIDGFERNQDNLQGWKNTMDGKADVSFVLFFDC  |                    | 122 |
| Mut | UMP/CMPK1 | <b>IVT</b> VEITISLLKREMDCTMAANAQKNKFLIDGFERNQDNLQGWKNTMDGKADVSFVLFFDC  |                    | 122 |
|     |           | 134                                                                    | LID domain         |     |
| WT  | UMP/CMPK1 | NNEICIER <b>CLE</b> RKSSGRSDDNRESLEKRIQTYLQSTKPIIDLYEEMGKVKKIDASKSVDE  |                    | 183 |
| Mut | UMP/CMPK1 | NNEICIER <b>CLE</b> MKGSSGRSDDNRESLEKRIQTYLQSTKPIIDLYEEMGKVKKIDASKSVDE |                    | 183 |
| WT  | UMP/CMPK1 | VFDEVVQIFDKEG-----                                                     |                    | 196 |
| Mut | UMP/CMPK1 | VFDEVVQIFDKEG-----                                                     |                    | 196 |

B

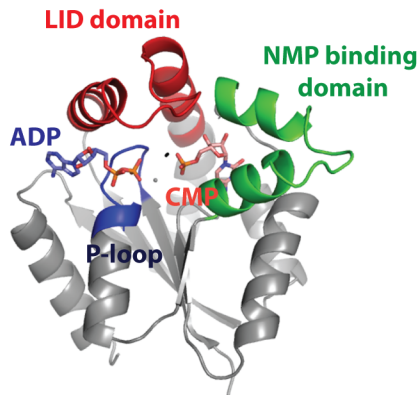

**Supplementary Figure S6:** (A) sequence alignment of the wild-type and the mutant UMP/CMPK1. The main domains of the UMP/CMPK1 are represented by colored boxes. Mutated positions 64 and 134 are shown as red bold letter. (B) Model of the human UMP/CMPK1 in closed conformation, complexed to CMP and ADP (based on the structure of the *D.discoideum* UMP/CMPK; pdb code: 2UKD). The same colors are used, as in panel A, to depict the domains of the proteins.



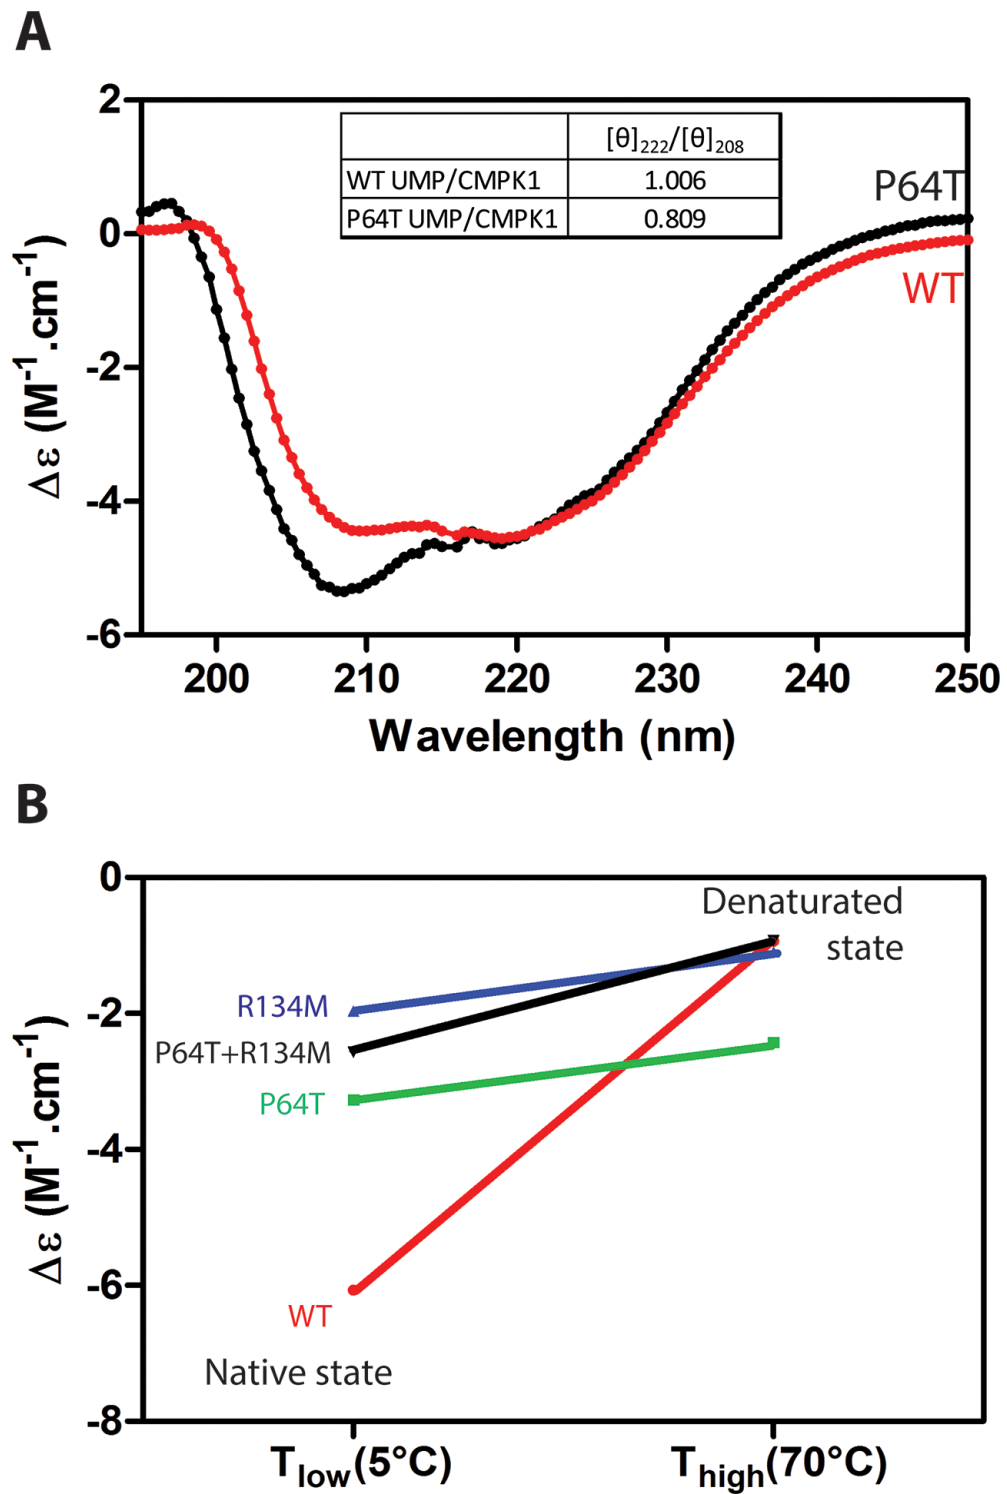

**Supplementary Figure S7:** (A) circular dichroism spectra of the wild-type and the P64T UMP/CMPK1 followed between 195 nm and 250 nm. The spectra were acquired at 25°C in Tris-HCl buffer. Molar ellipticity for both proteins was calculated as the ratio of  $\theta_{222}/\theta_{208}$ . (B) Native and denaturated states of the wild-type and the mutants UMP/CMPK1s at the extreme temperatures of 5°C and 70°C.

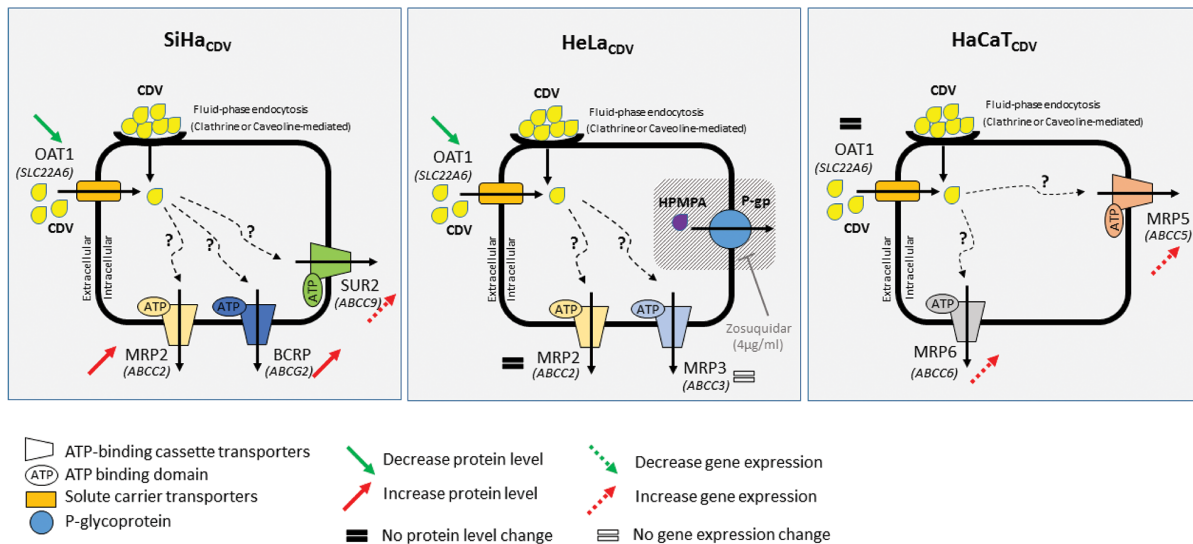

**Supplementary Figure S8: Scheme summarizing the efflux transporters that might be linked with CDV<sup>R</sup> in the three cell types.** Uptake of CDV is shown as fluid-phase endocytosis or through OAT1 that have been described in the literature. Hypothesis have been made on the efflux through the different ABC transporters according to the data obtain by microarray experiments. In SiHa<sub>CDV</sub> cells, MRP2, BCRP and SUR2 are good candidates to validate CDV<sup>R</sup> through drug efflux. In HeLa<sub>CDV</sub>, MRP2 and MRP3 are upregulated and might contribute to CDV<sup>R</sup>. It is worth noting that P-gp is probably involved in HPMPA<sup>R</sup> since co-treatment with zosuquidar is able to revers resistance to HPMPA. In HaCaT<sub>CDV</sub>, MRP5 and MRP6 might be involved in CDV<sup>R</sup>.

Acyclic nucleoside phosphonates

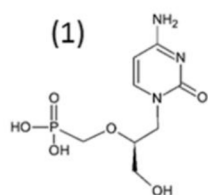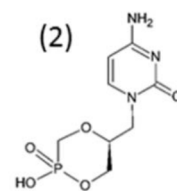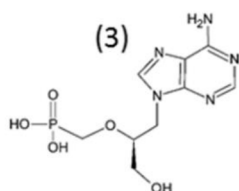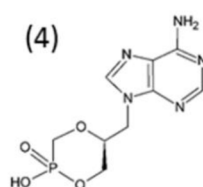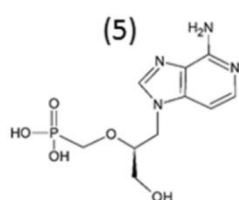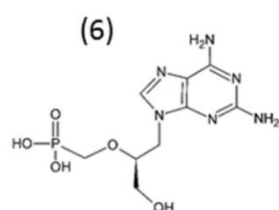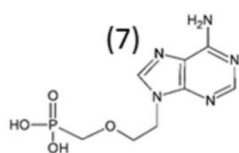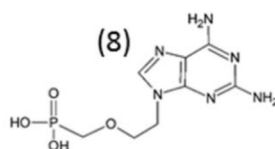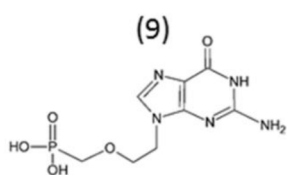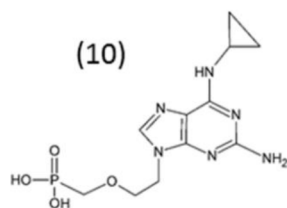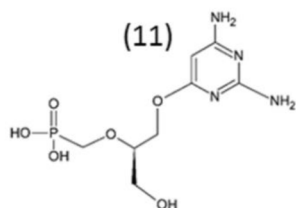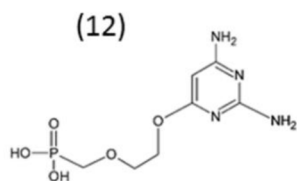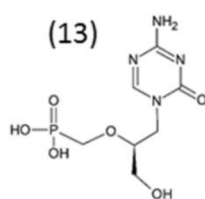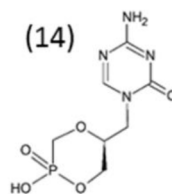

Anticancer chemotherapeutics :

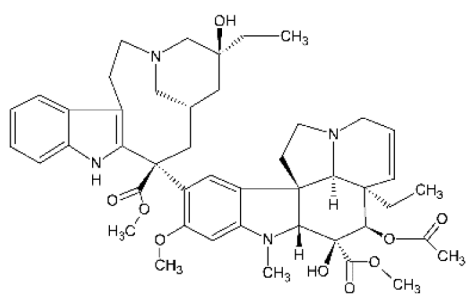

(a)

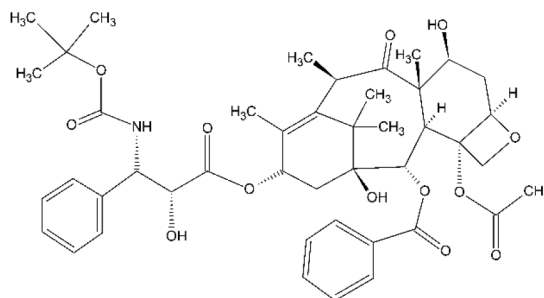

(b)

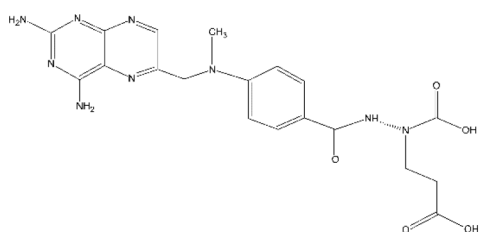

(c)

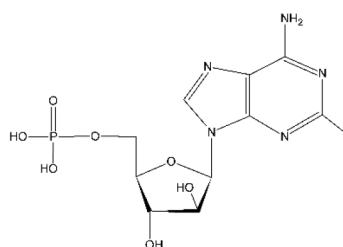

(d)

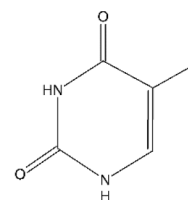

(e)

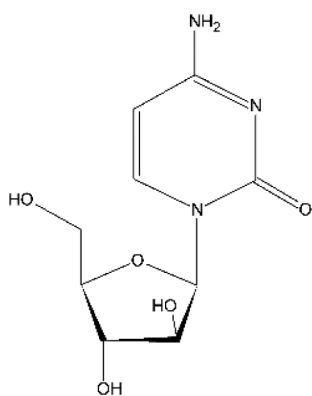

(f)

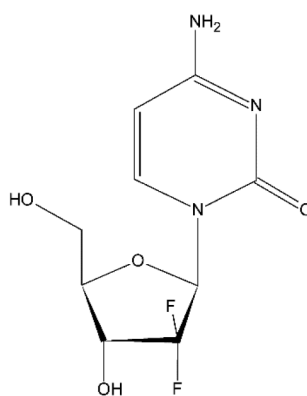

(g)

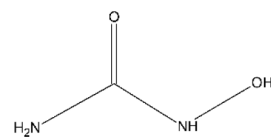

(h)

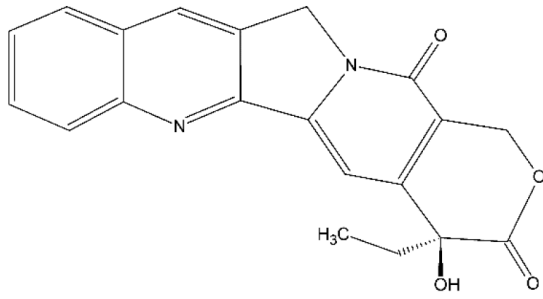

(i)

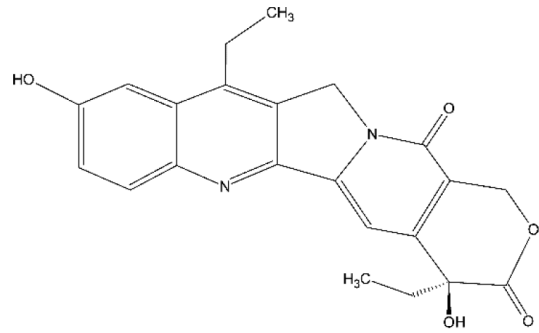

(j)

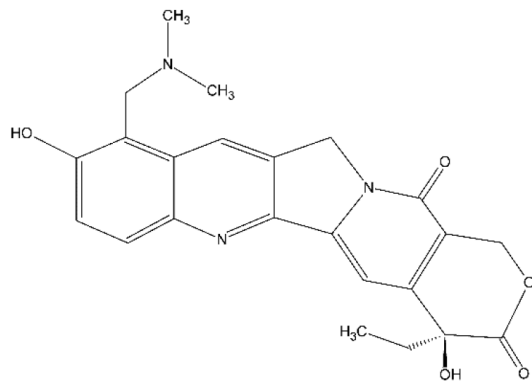

(k)

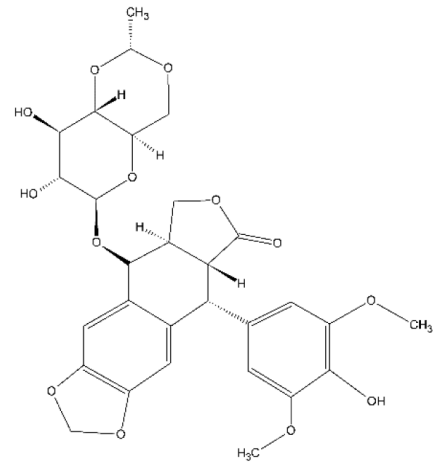

(l)

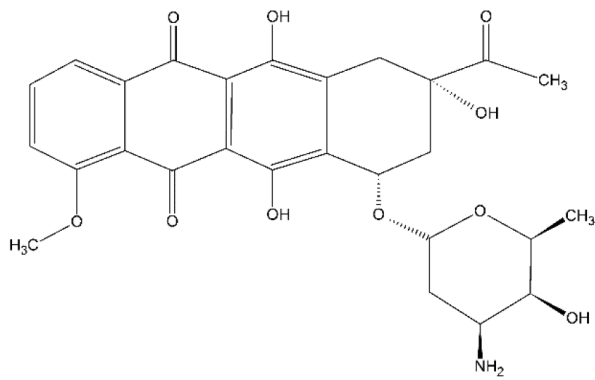

(m)

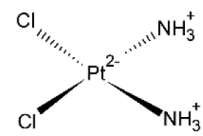

(n)

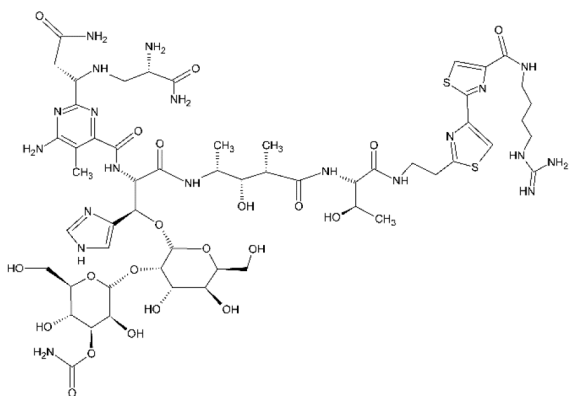

(o)

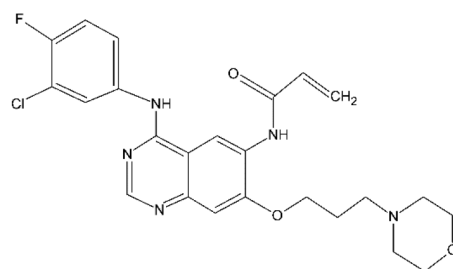

(p)

Transporters inhibitors

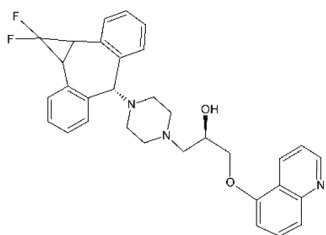

(A)

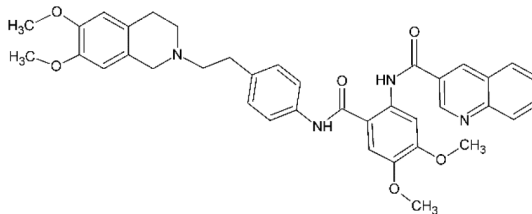

(B)

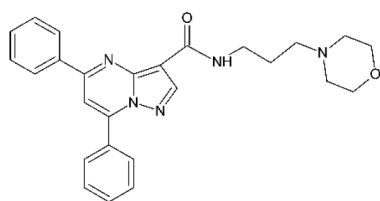

(C)

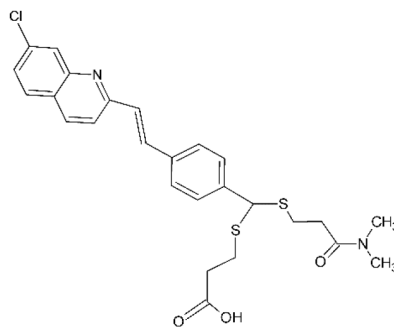

(D)

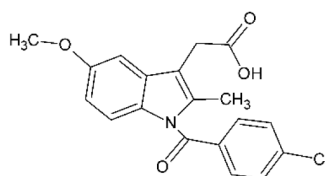

(E)

**Supplementary Figure S9: Chemical structure of the compounds used in this study.** Compounds (1–14) correspond to the nucleotide analogs. (a–p) groups the drugs used in cancer therapy and (A–E) are the transporter inhibitors assessed in this study.
